# Supplementary material
Source: PubMed Central journal article supplement (PMC2832598)
Supplement: NIHMS113426-supplement-01.pdf [file NIHMS113426-supplement-01.pdf]

# Web-based Supplementary Materials for Combining Information from Cancer Registry and Medical Records Data to Improve Analyses of Adjuvant Cancer Therapies

by Yulei He and Alan M. Zaslavsky

## 1 Gibbs Sampling Algorithm

We only include random intercepts in both the outcome and reporting domains of the latent variable models (1) and (2), with  $L = 2$ . Suppose  $S$  contains  $m$  hospitals, and in hospital  $i$  there are  $n_i$  patients. The observed data consist of  $\{Y_{O1ij}^{obs}\}$  and  $\{Y_{O2ij}^{obs}\}$  in  $S_1$ ,  $\{Y_{R1ij}\}$  and  $\{Y_{R2ij}\}$  in  $S$ , and covariates  $\{\mathbf{X}_{Oij}\}$  and  $\{\mathbf{X}_{Rij}\}$  in  $S$ . The Gibbs sampler must draw

- a. Latent variables  $\{Z_{O1ij}\}$ ,  $\{Z_{O2ij}\}$ ,  $\{Z_{R1ij}\}$ , and  $\{Z_{R2ij}\}$ ;
- b. Parameters:  $\beta_O$ ,  $\beta_R$ ,  $\alpha = (\alpha_{21}, \alpha_{12})^T$ ,  $\rho_O = \begin{pmatrix} 1 & \rho_O \\ \rho_O & 1 \end{pmatrix}$ ,  $\rho_R = \begin{pmatrix} 1 & \rho_R \\ \rho_R & 1 \end{pmatrix}$ , and  $\Sigma$ ;
- c. Random effects  $\gamma_{Oi}$  and  $\gamma_{Ri}$ ,  $i = 1, \dots, m$ ;
- d. Missing values  $\{Y_{O1ij}^{mis}\}$  and  $\{Y_{O2ij}^{mis}\}$  in  $S_2$ .

When  $Y_{Oij}$  is observed or imputed to be 0, then  $Y_{Rij} = 0$  regardless of the value of  $Z_{Rij}$ ; hence we need not draw  $Z_{Rij}$ . This reduces the amount of latent data and also reduces serial

dependence in draws of reporting model parameters  $\beta_R$  and  $\{\gamma_{Ri}\}$ . Define subsets of subjects  $SC_{ab} = \{(i, j) : Y_{O1ij} = a, Y_{O2ij} = b\}$ ,  $a, b = 0, 1$ . As specified in Section 2.4, the sampling steps for the latent variables and parameters of the reporting model are only conducted in  $S_1$ .

The detailed steps of the algorithm are as follows:

Step 1. Draw latent variables  $\{Z_{O1ij}, Z_{O2ij}\}$  from truncated bivariate normal distributions with mean  $\mathbf{X}_{Oij}\beta_O + \gamma_{Oi}$  and covariance matrix  $\rho_O$  with the signs of latents depending on  $Y_{O1ij}$  and  $Y_{O2ij}$ , respectively, i.e.  $Z_{Olij} > 0$  iff  $Y_{Olij} = 1$ . This can be implemented by iterating between draws from conditional truncated univariate normal distributions  $f(Z_{O1ij}|Z_{O2ij})$  and  $f(Z_{O2ij}|Z_{O1ij})$ . For example,  $[Z_{O1ij}|Z_{O2ij}]$  draws from the positive or negative part of a univariate normal distribution with mean  $X_{O1ij}\beta_{O1} + \gamma_{O1i} + \rho_O(Z_{O2ij} - X_{O2ij}\beta_{O2} - \gamma_{O2i})$  and variance  $1 - \rho_O^2$ .

Step 2. Draw latent variables  $\{Z_{R1ij}, Z_{R2ij}\}$ . Similar to Step 1,  $Z_{R1ij}$  and  $Z_{R2ij}$  can be drawn jointly from a truncated bivariate normal distribution in  $SC_{11}$ , while  $Z_{R1ij}(Z_{R2ij})$  is drawn from a truncated univariate normal distribution in  $SC_{10}(SC_{01})$ . Neither is drawn in  $SC_{00}$ .

Step 3. Assuming a flat prior for  $\beta_O$ , draw it from  $[\beta_O|\text{others}]$

$$\sim N\left(\left(\sum_{i,j \in S} \mathbf{X}_{Oij}^T \rho_O^{-1} \mathbf{X}_{Oij}\right)^{-1} \left(\sum_{i,j \in S} \mathbf{X}_{Oij}^T \rho_O^{-1} (Z_{Oij} - \gamma_{Oi})\right), \left(\sum_{i,j \in S} \mathbf{X}_{Oij}^T \rho_O^{-1} \mathbf{X}_{Oij}\right)^{-1}\right).$$

Step 4. Assuming a flat prior, the posterior distribution of  $\beta_{(R)}$  is proportional to the product of the bivariate normal density of  $\{Z_{R1ij}, Z_{R2ij}\}$  over  $SC_{11}$  and the two univariate normal densities of  $\{Z_{R1ij}\}$  and  $\{Z_{R2ij}\}$  over  $SC_{10}$  and  $SC_{01}$ , respectively. Applying the technique of combining multiple normals, the posterior distribution of  $\beta_R$  is shown to be

$$\beta_R \sim N(\mu_{\beta_R}, \Omega_{\beta_R}),$$

where

$$\Omega_{\beta_R} = \left( \sum_{i,j \in SC_{11}} \mathbf{X}_{Rij}^T \boldsymbol{\rho}_R^{-1} \mathbf{X}_{Rij} + \begin{pmatrix} \sum_{i,j \in SC_{10}} X_{R1ij}^T X_{R1ij} & 0 \\ 0 & \sum_{i,j \in SC_{01}} X_{R2ij}^T X_{R2ij} \end{pmatrix} \right)^{-1},$$

and

$$\boldsymbol{\mu}_{\beta_R} = \Omega_{\beta_R} \left( \sum_{i,j \in SC_{11}} \mathbf{X}_{Rij}^T \boldsymbol{\rho}_R^{-1} (Z_{Rij} - \gamma_{Ri} - \boldsymbol{\alpha}) + \begin{pmatrix} \sum_{i,j \in SC_{10}} X_{R1ij}^T (Z_{R1ij} - \gamma_{R1ij}) \\ \sum_{i,j \in SC_{01}} X_{R2ij}^T (Z_{R2ij} - \gamma_{R2ij}) \end{pmatrix} \right).$$

Step 5. Draw  $\boldsymbol{\alpha}$  from

$$[\boldsymbol{\alpha} | \text{others}] \sim N \left( \sum_{i,j \in SC_{11}} \frac{(Z_{Rij} - \mathbf{X}_{Rij} \boldsymbol{\beta}_R - \gamma_{Ri})}{n_{SC_{11}}}, \frac{\boldsymbol{\rho}_R}{n_{SC_{11}}} \right),$$

where  $n_{SC_{11}}$  is the number of individuals in  $SC_{11}$  at  $S_1$ .

Step 6. Draw random effects  $\gamma_i$ . The posterior density of  $\gamma_i$  is proportional to the product of two bivariate normal densities of  $\{Z_{O1ij}, Z_{O2ij}\}$  and  $\{Z_{R1ij}, Z_{R2ij}\}$ , two univariate normal densities of  $\{Z_{R1ij}\}$  and  $\{Z_{R2ij}\}$ , and the normal prior for  $\gamma_i$ , and is a normal with covariance matrix

$$\Omega_{\gamma_i} = \left( \boldsymbol{\Sigma}^{-1} + \begin{pmatrix} n_i \boldsymbol{\rho}_O^{-1} & 0 \\ 0 & n_{i,SC_{11}} \boldsymbol{\rho}_R^{-1} + \begin{pmatrix} n_{i,SC_{10}} & 0 \\ 0 & n_{i,SC_{01}} \end{pmatrix} \end{pmatrix} \right)^{-1},$$

and mean

$$\boldsymbol{\mu}_{\gamma_i} = \Omega_{\gamma_i}^{-1} \left( \begin{array}{c} \boldsymbol{\rho}_O^{-1} \sum_j (Z_{Oij} - \mathbf{X}_{Oij} \boldsymbol{\beta}_O) \\ \boldsymbol{\rho}_R^{-1} \sum_{j \in SC_{11}} (Z_{Rij} - \mathbf{X}_{Rij} \boldsymbol{\beta}_R - \boldsymbol{\alpha}) + \begin{pmatrix} \sum_{j \in SC_{10}} (Z_{R1ij} - X_{R1ij} \beta_{R1}) \\ \sum_{j \in SC_{01}} (Z_{R2ij} - X_{R2ij} \beta_{R2}) \end{pmatrix} \end{array} \right),$$

where  $n_{i,SC_{11}}$ ,  $n_{i,SC_{10}}$ , and  $n_{i,SC_{01}}$  are the number of subjects in  $SC_{11}$ ,  $SC_{10}$ , and  $SC_{01}$  at cluster  $i$  from  $S_1$ , respectively. If we simplify the model assumption and only include the random effects  $\gamma_{O_i}$ , as in our application, they can be drawn from the normals with mean and covariance as the corresponding subparts of  $\boldsymbol{\mu}_{\gamma_i}$  and  $\boldsymbol{\Omega}_{\gamma_i}$ , respectively.

Step 7. Draw  $\rho_O$  and  $\rho_R$ . The densities  $[\rho_O|\text{others}]$  and  $[\rho_R|\text{others}]$  are proportional to the bivariate normal densities of  $\{Z_{O1ij}, Z_{O2ij}\}$  and  $\{Z_{R1ij}, Z_{R2ij}\}$ . Since neither of them has a closed form, they are sampled using the adaptive rejection Metropolis sampling.

Step 8. Draw  $\boldsymbol{\Sigma}$  from

$$[\boldsymbol{\Sigma}|\text{others}] \sim IW(m + \nu, (\sum_{i \in S} \gamma_i \gamma_i^T + \Lambda^{-1})^{-1}).$$

Step 9. Imputation of  $\{Y_{O1ij}^{mis}\}$  and  $\{Y_{O2ij}^{mis}\}$  involves estimating conditional probabilities of

$P(Y_{O1ij}, Y_{O2ij} | Y_{R1ij}, Y_{R2ij}, \text{others})$ . When  $Y_{Rlij} = 1$ ,  $Y_{Olij}$  is deterministically set to 1. When  $Y_{Rlij} = 0$  for one of both of  $l = 1, 2$ , the corresponding probability or joint probabilities of  $Y_{Olij} = 1$  can be calculated by straightforward application of Bayes rule using conditional probabilities that depend on univariate or bivariate normal cumulative distributions.

## 2 Tables

Table 2: Estimates from the bivariate model

| Predictor               | Chemotherapy         |                         |                          |                         | Radiation therapy |                         |                 |                         |
|-------------------------|----------------------|-------------------------|--------------------------|-------------------------|-------------------|-------------------------|-----------------|-------------------------|
|                         | $\hat{\beta}_O$      | $\widehat{SE}(\beta_O)$ | $\hat{\beta}_R$          | $\widehat{SE}(\beta_R)$ | $\hat{\beta}_O$   | $\widehat{SE}(\beta_O)$ | $\hat{\beta}_R$ | $\widehat{SE}(\beta_R)$ |
| Intercept               | 0.097                | 0.128                   | 1.195*                   | 0.228                   | -1.204*           | 0.119                   | -0.027          | 0.525                   |
| Age                     |                      |                         |                          |                         |                   |                         |                 |                         |
| 65-74                   | REF                  |                         |                          |                         |                   |                         |                 |                         |
| 18-54                   | 0.280*               | 0.064                   | 0.486*                   | 0.140                   | 0.245*            | 0.066                   | 0.387           | 0.263                   |
| 55-64                   | 0.213*               | 0.061                   | 0.345*                   | 0.135                   | 0.195*            | 0.062                   | 0.356           | 0.243                   |
| 75-84                   | -0.763*              | 0.054                   | 0.134                    | 0.136                   | -0.363*           | 0.064                   | -0.006          | 0.260                   |
| 85+                     | -1.789*              | 0.100                   | -0.291                   | 0.406                   | -0.911*           | 0.149                   | -1.035          | 0.643                   |
| Sex                     |                      |                         |                          |                         |                   |                         |                 |                         |
| Male                    | REF                  |                         |                          |                         |                   |                         |                 |                         |
| Female                  | 0.001                | 0.040                   | -0.104                   | 0.100                   | -0.229*           | 0.044                   | 0.246           | 0.186                   |
| Race                    |                      |                         |                          |                         |                   |                         |                 |                         |
| White                   | REF                  |                         |                          |                         |                   |                         |                 |                         |
| Black                   | 0.085                | 0.091                   | -0.201                   | 0.223                   | -0.069            | 0.098                   | -0.348          | 0.414                   |
| Hispanic                | 0.103                | 0.070                   | -0.096                   | 0.170                   | 0.020             | 0.069                   | 0.226           | 0.326                   |
| Asian                   | 0.044                | 0.072                   | 0.006                    | 0.154                   | 0.136             | 0.077                   | -0.428          | 0.275                   |
| Cancer type             |                      |                         |                          |                         |                   |                         |                 |                         |
| Stage 3 colon           | REF                  |                         |                          |                         |                   |                         |                 |                         |
| Stage 2 rectal          | -0.526*              | 0.057                   | 0.440                    | 0.236                   | 1.532*            | 0.065                   | 0.623*          | 0.228                   |
| Stage 3 rectal          | 0.205*               | 0.067                   | 0.213                    | 0.189                   | 1.857*            | 0.062                   | 0.596*          | 0.218                   |
| Income                  |                      |                         |                          |                         |                   |                         |                 |                         |
| > 50K                   | REF                  |                         |                          |                         |                   |                         |                 |                         |
| 5-25K                   | -0.129*              | 0.060                   | -0.067                   | 0.151                   | -0.083            | 0.063                   | 0.132           | 0.275                   |
| 30-35K                  | -0.054               | 0.062                   | -0.045                   | 0.145                   | -0.045            | 0.061                   | 0.069           | 0.264                   |
| 40-50K                  | -0.083               | 0.051                   | 0.174                    | 0.132                   | 0.039             | 0.058                   | -0.176          | 0.233                   |
| Marital status          |                      |                         |                          |                         |                   |                         |                 |                         |
| Unmarried               | REF                  |                         |                          |                         |                   |                         |                 |                         |
| Married                 | 0.289*               | 0.044                   | -0.206*                  | 0.107                   | 0.131*            | 0.046                   | -0.143          | 0.191                   |
| Comorbidity             | -0.100*              | 0.014                   | -0.027                   | 0.041                   | -0.090*           | 0.018                   | 0.054           | 0.083                   |
| Hospital transfer       |                      |                         |                          |                         |                   |                         |                 |                         |
| No                      | REF                  |                         |                          |                         |                   |                         |                 |                         |
| Yes                     | 0.178*               | 0.092                   | 0.317                    | 0.244                   | 0.219*            | 0.096                   | 0.376           | 0.412                   |
| Hospital volume         |                      |                         |                          |                         |                   |                         |                 |                         |
| High volume             | REF                  |                         |                          |                         |                   |                         |                 |                         |
| Low volume              | 0.144                | 0.102                   | -0.590*                  | 0.164                   | 0.170             | 0.093                   | -0.649*         | 0.265                   |
| Medium volume           | 0.164                | 0.097                   | -0.548*                  | 0.117                   | 0.050             | 0.066                   | -0.038          | 0.219                   |
| ACOS hospital           |                      |                         |                          |                         |                   |                         |                 |                         |
| No                      | REF                  |                         |                          |                         |                   |                         |                 |                         |
| Yes                     | 0.363*               | 0.077                   | 0.031                    | 0.107                   | 0.166*            | 0.060                   | 0.252           | 0.188                   |
| Rural hospital          |                      |                         |                          |                         |                   |                         |                 |                         |
| No                      | REF                  |                         |                          |                         |                   |                         |                 |                         |
| Yes                     | 0.128                | 0.081                   | -0.290*                  | 0.150                   | 0.099             | 0.081                   | -0.332          | 0.290                   |
| Teaching hospital       |                      |                         |                          |                         |                   |                         |                 |                         |
| No                      | REF                  |                         |                          |                         |                   |                         |                 |                         |
| Yes                     | -0.207*              | 0.110                   | 0.284                    | 0.165                   | -0.128            | 0.086                   | 0.555           | 0.383                   |
| Within survey region    |                      |                         |                          |                         |                   |                         |                 |                         |
| No                      | REF                  |                         |                          |                         |                   |                         |                 |                         |
| Yes                     | 0.457*               | 0.072                   | NA                       | NA                      | 0.107             | 0.059                   | NA              | NA                      |
| Treated in 96 or 97     |                      |                         |                          |                         |                   |                         |                 |                         |
| No                      | REF                  |                         |                          |                         |                   |                         |                 |                         |
| Yes                     | 0.098*               | 0.031                   | NA                       | NA                      | 0.069*            | 0.035                   | NA              | NA                      |
| Receipt of Radiation    |                      |                         |                          |                         |                   |                         |                 |                         |
| No                      | REF                  |                         |                          |                         |                   |                         |                 |                         |
| Yes                     | NA                   | NA                      | 0.477*                   | 0.144                   | NA                | NA                      | NA              | NA                      |
| Receipt of Chemo        |                      |                         |                          |                         |                   |                         |                 |                         |
| No                      | REF                  |                         |                          |                         |                   |                         |                 |                         |
| Yes                     | NA                   | NA                      | NA                       | NA                      | NA                | NA                      | 0.458           | 0.305                   |
| Correlation coefficient | $\hat{\rho}_O$       | $\widehat{SE}(\rho_O)$  | $\hat{\rho}_R$           | $\widehat{SE}(\rho_R)$  |                   |                         |                 |                         |
|                         | 0.704*               | 0.028                   | 0.770*                   | 0.074                   |                   |                         |                 |                         |
| Random effects variance | $\sigma^2_{O,chemo}$ | $\widehat{SE}$          | $\sigma^2_{O,radiation}$ | $\widehat{SE}$          | $\widehat{COR}_O$ | $\widehat{SE}$          |                 |                         |
|                         | 0.238*               | 0.032                   | 0.087*                   | 0.015                   | 0.104             | 0.105                   |                 |                         |

Note: \* denotes that 95% credible interval does not contain 0.

Table 3: Full posterior predictive checking results

| Testing Statistics                            | Survey    | Univariate models |                 | Bivariate model  |                 |
|-----------------------------------------------|-----------|-------------------|-----------------|------------------|-----------------|
|                                               | Estimates | 90% CI            | <i>P</i> -value | 90% CI           | <i>P</i> -value |
| $\bar{Y}_{O1\cdot}$                           | 0.733     | (0.700, 0.741)    | 0.84            | (0.695, 0.737)   | 0.91            |
| $\bar{Y}_{O2\cdot}$                           | 0.254     | (0.238, 0.277)    | 0.45            | (0.239, 0.278)   | 0.38            |
| $\bar{Y}_{R1\cdot}$                           | 0.614     | (0.579, 0.628)    | 0.77            | (0.577, 0.624)   | 0.84            |
| $\bar{Y}_{R2\cdot}$                           | 0.220     | (0.199, 0.235)    | 0.63            | (0.199, 0.236)   | 0.60            |
| $P(Y_{R1ij} = 1 Y_{O1ij} = 1)$                | 0.838     | (0.811, 0.861)    | 0.55            | (0.813, 0.862)   | 0.52            |
| $P(Y_{R2ij} = 1 Y_{O2ij} = 1)$                | 0.864     | (0.802, 0.886)    | 0.78            | (0.802, 0.886)   | 0.79            |
| $OR(Y_{O1ij}, Y_{O2ij})$                      | 4.958     | (1.168, 1.869)    | 1               | (3.589, 7.167)   | 0.48            |
| $OR(Y_{O1ij}, Y_{R2ij})$                      | 5.536     | (1.186, 1.977)    | 1               | (3.870, 8.395)   | 0.52            |
| $OR(Y_{O2ij}, Y_{R1ij})$                      | 4.522     | (1.315, 2.030)    | 1               | (3.543, 6.514)   | 0.41            |
| $OR(Y_{R1ij}, Y_{R2ij})$                      | 7.825     | (1.378, 2.197)    | 1               | (5.002, 10.073)  | 0.70            |
| $VAR(\bar{Y}_{O1i\cdot})$                     | 0.0330    | (0.0394, 0.0632)  | 0.003           | (0.0407, 0.0636) | 0.001           |
| $VAR(\bar{Y}_{O2i\cdot})$                     | 0.0457    | (0.0323, 0.0546)  | 0.65            | (0.0327, 0.0558) | 0.63            |
| $COR(\bar{Y}_{O1i\cdot}, \bar{Y}_{O2i\cdot})$ | 0.178     | (-0.164, 0.282)   | 0.78            | (0.0208, 0.415)  | 0.28            |
| $VAR(\bar{Y}_{R1i\cdot})$                     | 0.0625    | (0.0481, 0.0701)  | 0.71            | (0.0486, 0.0695) | 0.70            |
| $VAR(\bar{Y}_{R2i\cdot})$                     | 0.0368    | (0.0239, 0.0460)  | 0.63            | (0.0241, 0.0467) | 0.62            |
| $COR(\bar{Y}_{R1i\cdot}, \bar{Y}_{R2i\cdot})$ | 0.270     | (-0.128, 0.321)   | 0.88            | (0.106, 0.502)   | 0.31            |
| $COR(\bar{Y}_{O1i\cdot}, \bar{Y}_{R1i\cdot})$ | 0.507     | (0.560, 0.833)    | 0.01            | (0.582, 0.839)   | 0.009           |
| $COR(\bar{Y}_{O2i\cdot}, \bar{Y}_{R2i\cdot})$ | 0.728     | (0.617, 0.946)    | 0.20            | (0.611, 0.942)   | 0.23            |
| $COR(\bar{Y}_{O1i\cdot}, \bar{Y}_{R2i\cdot})$ | 0.104     | (-0.182, 0.256)   | 0.62            | (-0.012, 0.378)  | 0.18            |
| $COR(\bar{Y}_{O2i\cdot}, \bar{Y}_{R1i\cdot})$ | 0.160     | (-0.141, 0.319)   | 0.67            | (0.056, 0.486)   | 0.18            |

Note: The indexes  $i$  and  $j$  denote hospital and patients within the hospitals in the survey, respectively.

Table 4: Prediction of receiving radiation therapy for colon III cancer patients using logistic regression model

| Predictor         | Using the Survey |       | Using the Registry |       | Univariate model Imputation |       | Bivariate model Imputation |       |
|-------------------|------------------|-------|--------------------|-------|-----------------------------|-------|----------------------------|-------|
|                   | EST              | SE    | EST                | SE    | EST                         | SE    | EST                        | SE    |
| Age               |                  |       |                    |       |                             |       |                            |       |
| 65-74             | REF              |       |                    |       |                             |       |                            |       |
| 18-54             | 0.314            | 0.296 | 0.417*             | 0.115 | 0.321*                      | 0.142 | 0.308*                     | 0.128 |
| 55-64             | 0.402            | 0.272 | 0.437*             | 0.109 | 0.376*                      | 0.139 | 0.334*                     | 0.140 |
| 75-84             | 0.179            | 0.304 | -0.168             | 0.127 | -0.329*                     | 0.149 | -0.115                     | 0.148 |
| 85+               | 0.207            | 0.681 | -0.948*            | 0.373 | -0.781*                     | 0.366 | -0.409                     | 0.377 |
| Chemotherapy      |                  |       |                    |       |                             |       |                            |       |
| No                | REF              |       |                    |       |                             |       |                            |       |
| Yes               | 1.700*           | 0.440 | 1.806*             | 0.124 | 1.079*                      | 0.159 | 2.059*                     | 0.269 |
| Sex               |                  |       |                    |       |                             |       |                            |       |
| Male              | REF              |       |                    |       |                             |       |                            |       |
| Female            | -0.318           | 0.211 | -0.320*            | 0.085 | -0.367*                     | 0.108 | -0.466*                    | 0.096 |
| Race              |                  |       |                    |       |                             |       |                            |       |
| White             | REF              |       |                    |       |                             |       |                            |       |
| Black             | -0.082           | 0.475 | -0.356             | 0.188 | -0.072                      | 0.221 | -0.244                     | 0.219 |
| Hispanic          | 0.556            | 0.312 | 0.190              | 0.198 | 0.155                       | 0.147 | 0.120                      | 0.134 |
| Asian             | -0.664           | 0.369 | 0.157              | 0.148 | 0.177                       | 0.170 | 0.228                      | 0.182 |
| Income            |                  |       |                    |       |                             |       |                            |       |
| > 50K             | REF              |       |                    |       |                             |       |                            |       |
| 5-25K             | 0.098            | 0.311 | 0.078              | 0.123 | -0.045                      | 0.151 | 0.067                      | 0.164 |
| 30-35K            | -0.047           | 0.293 | 0.090              | 0.120 | 0.025                       | 0.138 | 0.090                      | 0.138 |
| 40-50K            | -0.071           | 0.275 | -0.033             | 0.114 | 0.100                       | 0.136 | 0.113                      | 0.128 |
| Marital status    |                  |       |                    |       |                             |       |                            |       |
| Unmarried         | REF              |       |                    |       |                             |       |                            |       |
| Married           | 0.078            | 0.228 | -0.015             | 0.092 | 0.023                       | 0.109 | 0.030                      | 0.126 |
| Comorbidity       | -0.011           | 0.084 | -0.056             | 0.038 | -0.085                      | 0.046 | -0.089*                    | 0.045 |
| Hospital transfer |                  |       |                    |       |                             |       |                            |       |
| No                | REF              |       |                    |       |                             |       |                            |       |
| Yes               | 0.297            | 0.433 | 0.240              | 0.156 | 0.236                       | 0.208 | 0.322                      | 0.215 |

Note: \* denotes significance at 5% level.
